# Supplementary material for: The Association Between Route of Post-menopausal Estrogen Administration and Blood Pressure and Arterial Stiffness in Community-Dwelling Women
Source: Frontiers journal article supplement (doi:10.3389/fcvm.2022.913609), 2022-06-10
Supplement: Table_1.pdf [file Table_1.pdf]

## Supplementary Tables

**Table 1: Multi-variate analysis of aPWV by route of administration of Hormone therapy presented as beta coefficients, [95% CI]**

|                           | Ever Use            | Current Use        | Past Use           |
|---------------------------|---------------------|--------------------|--------------------|
| Control (Reference Group) |                     |                    |                    |
| Oral                      | 0.03 [-0.2 , 0.3]   | -                  | 0.13 [-0.2 , 0.5]  |
| Transdermal               | -0.05 [-0.3 , 0.2]  | 0.04 [-0.4 , 0.3]  | -0.05 [-0.4 , 0.3] |
| Vaginal                   | -0.03 [-0.3 , 0.30] | -0.05 [-0.4 , 0.3] | -0.04 [-0.4 , 0.3] |
| Oral (Reference Group)    |                     |                    |                    |
| Transdermal               | -0.4 [-0.8 , 0.1]   | -                  | -0.3 [-1 , 0.3]    |
| Vaginal                   | -0.4 [-1 , 0.2]     | -                  | -0.4 [-1 , 0.4]    |

Only 2 participants were currently using oral HT, therefore not enough participants to run analyses. Adjusted for age, mean arterial pressure, hypertension, age of menopausal onset, and vasomotor symptoms.

<sup>a</sup> p<0.05 compared to reference group
