# Supplementary material for: The Association Between Route of Post-menopausal Estrogen Administration and Blood Pressure and Arterial Stiffness in Community-Dwelling Women
Source: Frontiers journal article supplement (doi:10.3389/fcvm.2022.913609), 2022-06-10
Supplement: Table_2.pdf [file Table_2.pdf]

## Supplementary Tables

**Table 2: Multi-variate analysis of AIx by route of administration of hormone therapy presented as beta coefficients, [95% CI]**

|                           | Ever Use          | Current Use    | Past Use        |
|---------------------------|-------------------|----------------|-----------------|
| Control (Reference Group) |                   |                |                 |
| Oral                      | 1.2 [-6 , 9]      | -              | 0.2 [-8 , 8]    |
| Transdermal               | -5.2 [-11, 0.6]   | -1.8 [-9 , 6]. | -1.80 [-9 , 6]  |
| Vaginal                   | 1.7 [-4, 8]       | 2.4 [-6 , 11]  | 2.4 [-6 , 11]   |
| Oral (Reference Group)    |                   |                |                 |
| Transdermal               | -5.3 [-0.8 , 0.1] | -              | 3 [-15 , 21]    |
| Vaginal                   | -2 [-18 , 14]     | -              | -2.3 [-21 , 26] |

Only 2 participants were currently using oral HT, therefore not enough participants to run analyses Adjusted for hypertension, age of menopausal onset, and vasomotor symptoms.

<sup>a</sup> p<0.05 compared to reference group
